# Identifying hidden Zika hotspots in Pernambuco, Brazil:

## A spatial analysis

Laís Picinini Freitas <sup>1,#a</sup>, Rachel Lowe <sup>2,3</sup>, Andrew E. Koepf <sup>1,4</sup>, Sandra Valongueiro Alves <sup>5</sup>, Molly Dondero <sup>6</sup>, Leticia J. Marteleto <sup>1,7\*</sup>

<sup>1</sup> Population Research Center, University of Texas at Austin, Austin, Texas, United States of America

<sup>2</sup> Centre on Climate Change and Planetary Health, London School of Hygiene & Tropical Medicine, London, United Kingdom

<sup>3</sup> Centre for Mathematical Modelling of Infectious Diseases, London School of Hygiene & Tropical Medicine, London, United Kingdom

<sup>4</sup> Department of Human Development and Family Sciences, University of Texas at Austin, Austin, Texas, United States of America

<sup>5</sup> Post-graduation Program of Public Health, Centro de Ciências da Saúde, Universidade Federal de Pernambuco, Recife, Pernambuco, Brazil

<sup>6</sup> Department of Sociology, American University, Washington, D.C., United States of America

<sup>7</sup> Department of Sociology, University of Texas at Austin, Austin, Texas, United States of America

<sup>#a</sup> Current Address: Programa de Computação Científica, Fundação Oswaldo Cruz, Rio de Janeiro, Brazil

\* Corresponding author

E-mail: [marteleto@prc.utexas.edu](mailto:marteleto@prc.utexas.edu) (LJM)

## 24 **Abstract**

25 Northeast Brazil has the world's highest rate of Zika-related microcephaly. Yet, in this  
26 hard-hit region, traditional case counts of Zika cannot accurately describe Zika risk. Reporting of  
27 Zika cases only became mandatory after its association with microcephaly in neonates, when the  
28 Zika epidemic was already declining in the region. To advance the study of the Brazilian Zika  
29 epidemic and its impacts, we identified hotspots of Zika in Pernambuco state, Northeast Brazil,  
30 using *Aedes*-borne diseases (dengue, chikungunya and Zika) and microcephaly data. We used the  
31 Kulldorff's Poisson purely spatial scan statistic to detect low- and high-risk clusters and combined  
32 the results to identify the municipalities most affected by the Zika epidemic. Municipalities were  
33 classified as hotspots if they were part of any high-risk cluster, and classified according to a  
34 gradient of Zika burden during the epidemic, considering the strength of the evidence. In  
35 Pernambuco, officials confirmed 123,934 dengue cases, 167 Zika cases, and 32,983 chikungunya  
36 cases between 2014-2017, and 800 microcephaly cases between 2015-2017. We identified 26  
37 *Aedes*-borne diseases clusters (11 high-risk), and 5 microcephaly cases clusters (3 high-risk).  
38 Combining the results, sixty-three out of 184 municipalities were identified as hotspots for Zika.  
39 The northeast of Pernambuco and the Sertão region were hit hardest by the Zika epidemic. The first  
40 is the most populous area, while the second has one of the highest rates of social and economic  
41 inequality in Brazil. The identification of Sertão as a Zika hotspot was only possible because the  
42 clusters results were combined. The under-reporting of acute infectious diseases is expected to be  
43 higher in poor areas. Therefore, using only *Aedes*-borne data does not correctly identify the high-  
44 risk areas. We successfully identified hidden Zika hotspots using a simple methodology combining  
45 *Aedes*-borne diseases and microcephaly information.

## 46 **Introduction**

47           Accurately assessing a community's disease risk is a major goal in public health research  
48 and is critical to the study of epidemics and their consequences. When new viral diseases emerge,  
49 this task is challenging, as the reporting of cases may only be established after widespread  
50 transmission has occurred. When the Zika virus (ZIKV) reached Brazil in 2014, mandatory  
51 reporting of cases did not begin until 2016, at least a full year into the epidemic [1,2]. Given the  
52 difficulty of accurately assessing Zika burden during the epidemic and the lack of data, identifying  
53 areas that were hardest-hit remains a challenge.

54           ZIKV, a flavivirus transmitted by the *Aedes* mosquitoes, caused its first large outbreak in  
55 the island of Yap (Federated States of Micronesia) in 2007 [3]. According to genomics analyses,  
56 ZIKV was likely introduced in Brazil in the state of Pernambuco, possibly during 2013, and may  
57 have disseminated from there to other regions and even to other countries [4,5]. Zika was  
58 considered a benign disease until October 2015, when an unusual increase in the number of  
59 neonates with microcephaly was detected in Pernambuco, Northeast Brazil. Microcephaly and other  
60 congenital malformations were later associated with ZIKV infection during pregnancy, and the  
61 congenital Zika syndrome was first described [1]. Between January 2015 and November 2016,  
62 1,950 infection-related microcephaly cases were confirmed in Brazil, of which 1,487 (76.3%) were  
63 in the Northeast region [2]. By the end of the Zika epidemic, nowhere else in the world had  
64 microcephaly rates as high as those observed in Northeast Brazil.

65           The task of identifying high-risk areas for Zika is hampered by some important factors.  
66 First, the mandatory reporting of Zika cases to Brazilian health authorities only began in 2016, a full  
67 year after the epidemic began, and well after the assumed peak of cases in most of the Northeast  
68 region [2,6]. As a result, the number of reported Zika cases in this region and period of time is much  
69 lower than the reported cases of congenital microcephaly, despite well-established links between the  
70 two [7,8]. In the absence of Zika data for 2014 and 2015, the number of microcephaly cases likely

71 helps to identify areas that experienced Zika outbreaks. It is also important to note that  
72 microcephaly cases, given the severity of the condition, are much less likely to be under-reported  
73 than Zika cases. In a previous study the incidence of Zika by municipality in Brazil was estimated  
74 from the microcephaly cases rate [7]. However, whether the number of microcephaly cases depends  
75 only on the Zika incidence is debatable, and other factors – not considered in the aforementioned  
76 study – may be acting to modify the risk of this congenital malformation [9–11].

77 Information on the distribution of other arboviruses endemic in Brazil, namely dengue and  
78 chikungunya, can also serve as indicators of Zika incidence during this period. A major factor  
79 linking the incidence of Zika, dengue, and chikungunya is the fact that they share the same disease  
80 vector, the *Aedes aegypti* mosquito [12]. By virtue of a shared carrier, a greater risk of one arbovirus  
81 in a given area implies greater risk of another arbovirus. Furthermore, it can be difficult in a clinical  
82 setting to distinguish between symptoms of Zika and symptoms of dengue and chikungunya, and  
83 cases of one are sometimes mistakenly reported as cases of another [13]. In fact, in the absence of a  
84 channel for reporting Zika cases in 2014 and 2015, the government in Pernambuco encouraged  
85 medical professionals to report Zika cases as dengue cases [14]. Thus, the distinction between Zika,  
86 dengue, and chikungunya during this period is blurred in official records for clinical as well as  
87 administrative reasons.

88 Therefore, we propose that an elevated risk of Zika during and immediately following the  
89 epidemic in Brazil (from 2014-2017) may be detected primarily by an increase in the incidence of  
90 microcephaly, as well as by increases in the incidence of dengue, chikungunya, and Zika itself.  
91 Considering these factors together represents a way to identify which areas were hit hardest by the  
92 Zika epidemic and which areas were less affected. This study sought to identify these areas in the  
93 state of Pernambuco by using Kulldorff's spatial scan statistics for identification of low- and high-  
94 risk clusters of *Aedes*-borne diseases (dengue, Zika, and chikungunya) and of microcephaly cases,

95 and classifying the municipalities in a gradient of Zika epidemic burden based on the combination  
96 of their cluster status.

97

## 98 **Methods**

### 99 **Study site**

100 Pernambuco is located in Northeast Brazil, and has 183 municipalities divided in five  
101 regions: Agreste, Mata, Metropolitan Region of Recife, São Francisco and Sertão (Fig 1). The state  
102 is characterized by coastal and marshy terrain, with varying climate conditions ranging from humid  
103 tropical (predominant on the coast) and semiarid (predominant in the interior). The population of  
104 Pernambuco was 8,796,448 in 2010, with 89.62 inhabitants per km<sup>2</sup> [15]. The Metropolitan Region  
105 of Recife has the highest population density, with 7,039.64 inhabitants per km<sup>2</sup> in the capital Recife  
106 [16]. Pernambuco is a poor and unequal state in Brazil, and one of the most severely affected states  
107 in the Zika epidemic, accounting for 16.8% of Brazil's reported cases of congenital Zika syndrome  
108 through the end of 2017 [17].

109 **Fig 1. Regions and municipalities of Pernambuco state, Brazil.**

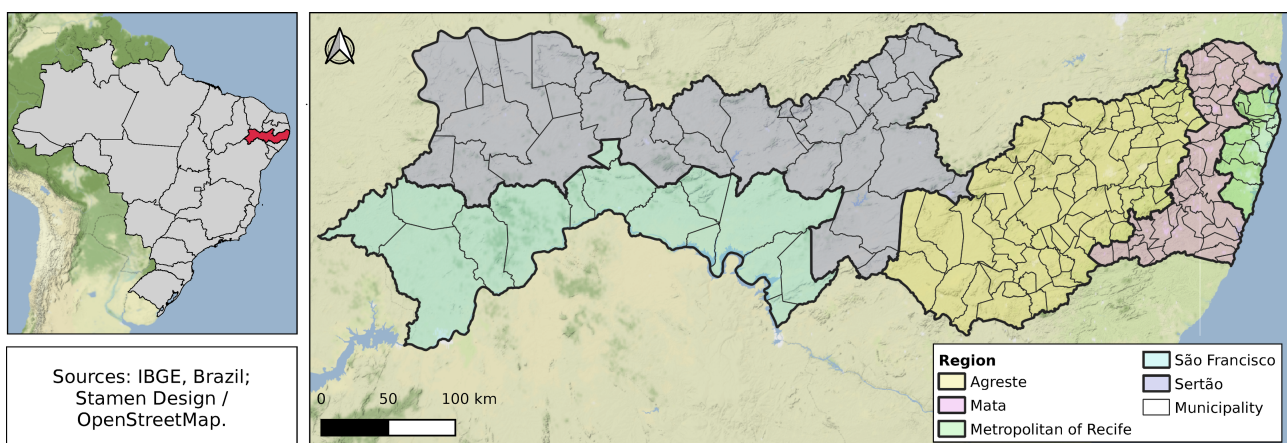

111

112

## 113 **Data**

114 Data on reported confirmed cases of dengue (2013-2017), Zika (2016-2017), and  
115 chikungunya (2015-2017) were obtained from the *Sistema de Informação de Agravos de*  
116 *Notificação* [Notifiable Diseases Information System] (SINAN), Brazilian Ministry of Health ([ftp://](ftp://ftp.datasus.gov.br/dissemin/publicos/SINAN/DADOS)  
117 [ftp.datasus.gov.br/dissemin/publicos/SINAN/DADOS](ftp://ftp.datasus.gov.br/dissemin/publicos/SINAN/DADOS)). The data not publicly available (Zika and  
118 chikungunya cases data) were requested from the Ministry of Health at [<https://esic.cgu.gov.br/>](https://esic.cgu.gov.br/),  
119 by using the Law of Access to Information. We analyzed cases that were confirmed by laboratory or  
120 epidemiological criteria, aggregated by municipality of notification and year.

121 We obtained the anonymized individual records of live births from the Brazilian Ministry  
122 of Health's *Sistema de Informações sobre Nascidos Vivos* [Live Births Information System]  
123 (SINASC) from 2013 to 2017. The SINASC data are publicly available at  
124 [<ftp://ftp.datasus.gov.br/dissemin/publicos/SINASC/>](ftp://ftp.datasus.gov.br/dissemin/publicos/SINASC/). Microcephaly cases were identified as those  
125 with the 10<sup>th</sup> Revision of the International Statistical Classification of Diseases and Related Health  
126 Problems (ICD-10) code “Q02” in any position of the variable corresponding to the classification of  
127 congenital anomalies. Then, the data was aggregated by municipality of residence of the mother and  
128 year of birth. The complete data were also aggregated to obtain the number of live births by  
129 municipality and year.

130 For the spatial scan statistics, we aggregated the *Aedes*-borne diseases data for the years of  
131 2014-2017, and the microcephaly data for the years of 2015-2017. We chose these years because  
132 Zika started causing outbreaks in the state in 2014 and the first Zika-related microcephaly cases  
133 were reported in 2015.

134 Population projections by municipality estimated by Freire *et al.* were used in the analysis  
135 [18]. Shapefiles were downloaded at the *Instituto Brasileiro de Geografia e Estatística* [Brazilian  
136 Institute of Geography and Statistics] (IBGE) website  
137 [<https://www.ibge.gov.br/geociencias/organizacao-do-territorio/malhas-territoriais/>](https://www.ibge.gov.br/geociencias/organizacao-do-territorio/malhas-territoriais/).

## 138 **Statistical analysis**

139 For the exploratory analysis, we calculated the incidence per 100,000 inhabitants for  
140 dengue, Zika and chikungunya, and the microcephaly incidence per 10,000 live births, by  
141 municipality, for each year and for all years combined. We excluded Fernando de Noronha  
142 municipality from the analysis as it is an island roughly 350 km away from the mainland.

143 We used the packages tidyverse (v. 1.3.0) [19] and ggplot2 (v. 3.3.0) [20] in R (v. 3.6.3)  
144 [21] to organize, analyse and visualize the data.

### 145 *Scan statistics*

146 To detect low and high-risk clusters of *Aedes*-borne diseases and microcephaly we used the  
147 Kulldorff's Poisson purely spatial scan statistic [22] for all years combined for i) dengue + Zika +  
148 chikungunya (2014-2017), and ii) microcephaly cases (2015-2017).

149 Purely spatial scan statistics identify clusters through moving circles across space by  
150 comparing the observed number of cases to the expected number of cases inside the circle [22]. The  
151 municipality was considered as part of the circle if its centroid was located within the circle. The  
152 clusters are ordered according to the log-likelihood ratio (LLR), where the cluster with the  
153 maximum LLR is the most likely cluster, that is, the cluster least likely to be due to chance [22].

154 The LLR is calculated as follows:

$$155 \quad LLR = \left(\frac{c}{E_c}\right)^c \left(\frac{C-c}{C-E_c}\right)^{C-c} \quad (1)$$

156 where  $c$  is the number of cases inside the cluster,  $C$  is the total number of cases in the state and  $E_c$  is  
157 the expected number of cases inside the circle. The  $E_c$  is calculated by:

$$158 \quad E_c = \frac{C}{P} * p \quad (2)$$

159 where  $P$  is the population of the state and  $p$  is the population inside the cluster.

160 To assess statistical significance, we performed Monte Carlo simulations (n=999) for each  
161 analysis. Clusters were considered to be statistically significant if p-value<0.05. Clusters were

162 restricted to not overlap geographically, to have at least 5 cases, to include a maximum of 50% of  
163 Pernambuco’s population at risk, and to have a maximum radius of 50 km.

164 SaTScan (v. 9.6) software [23] was applied within R (v. 3.6.3) [21], using the package  
165 rsatscan (v. 0.3.9200) [24]. The script of the analysis is available at <[https://github.com/laispfreitas/](https://github.com/laispfreitas/PE_satscan)  
166 [PE\\_satscan](https://github.com/laispfreitas/PE_satscan)>.

### 167 *Zika epidemic burden classification*

168 We combined the results from the scan statistics analysis to identify the municipalities that  
169 were most and least affected by the Zika epidemic (Table 1). Municipalities were classified as  
170 hotspots if they were part of any high-risk cluster, and as coldspots if they were part of any low-risk  
171 cluster and were not part of any high-risk cluster. We also classified the municipalities using a  
172 gradient of Zika burden during the epidemic. We considered microcephaly data to provide stronger  
173 evidence than *Aedes*-borne diseases because the latter are more likely to be under-reported.  
174 Therefore, being part of a high-risk cluster for microcephaly represented a higher Zika burden than  
175 being part of a high-risk *Aedes*-borne disease cluster.

176 **Table 1. Criteria for classification of municipalities in terms of estimated Zika burden during**  
177 **the epidemic, based on cluster status for microcephaly and dengue, Zika and chikungunya**  
178 **(DZC).**

| Zika burden    |          | Cluster type |           |
|----------------|----------|--------------|-----------|
| Classification | Gradient | Microcephaly | DZC       |
| Hotspots       | 5        | High-risk    | High-risk |
|                | 4        | High-risk    | -         |
|                | 3        | High-risk    | Low-risk  |
|                | 2        | -            | High-risk |
|                | 1        | Low-risk     | High-risk |
| Neutral        | 0        | -            | -         |
| Coldspots      | -1       | -            | Low-risk  |
|                | -2       | Low-risk     | -         |
|                | -3       | Low-risk     | Low-risk  |

179



## 180 Results

181 In the state of Pernambuco between 2013 and 2017, there were 128,591 dengue cases, 167  
182 Zika cases, 32,983 chikungunya cases, and 823 microcephaly cases (S1 Table). Of the 167 Zika  
183 reported cases, 96 were in Recife. In 2016, 25 municipalities notified at least one case of Zika.  
184 Cases of dengue peaked in 2015, while cases of chikungunya peaked in 2016 (Fig 2A). In 2015 the  
185 number of microcephaly cases increased dramatically, from 12 in 2014 to 494 cases (Fig 2B).

186 **Fig 2. Reported confirmed cases of dengue, Zika and chikungunya (A) and microcephaly in**  
187 **neonates (B) in Pernambuco state, Brazil, by year.**

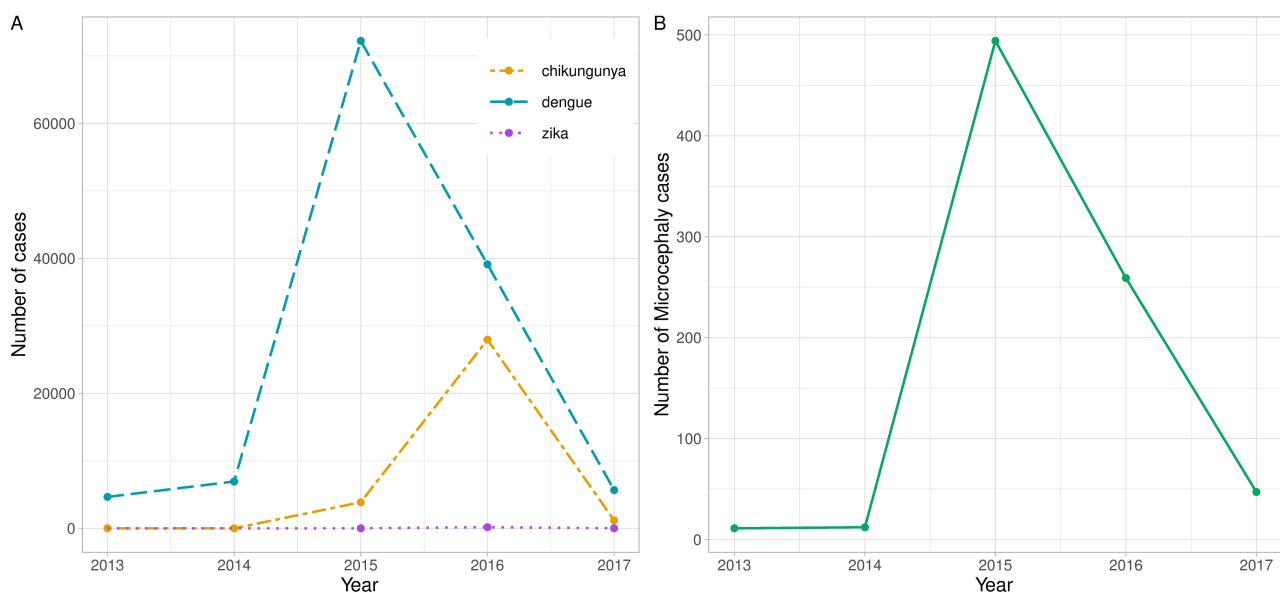

189 The cumulative incidence of dengue, Zika and chikungunya between 2013-2017 peaked at  
190 12056.6 cases per 100,000 inhabitants, with the highest incidence found in the Agreste region (Fig  
191 3A). In this period, four municipalities had no dengue, Zika, chikungunya or microcephaly cases.  
192 Higher microcephaly incidence rates were observed in the Sertão region, peaking at 59.4 cases per  
193 10,000 live-births (Fig 3B). Fifty out of 184 municipalities did not report any cases of  
194 microcephaly. The incidence rate per year for each disease and for microcephaly are included in the  
195 Supporting Information Material (S1-4 Fig).

196 **Fig 3. Cumulative incidence of dengue, Zika and chikungunya (DZC) per 100,000 inhabitants**  
197 **(A) and of microcephaly per 10,000 live-births (B), Pernambuco state, Brazil, 2013-2017.**

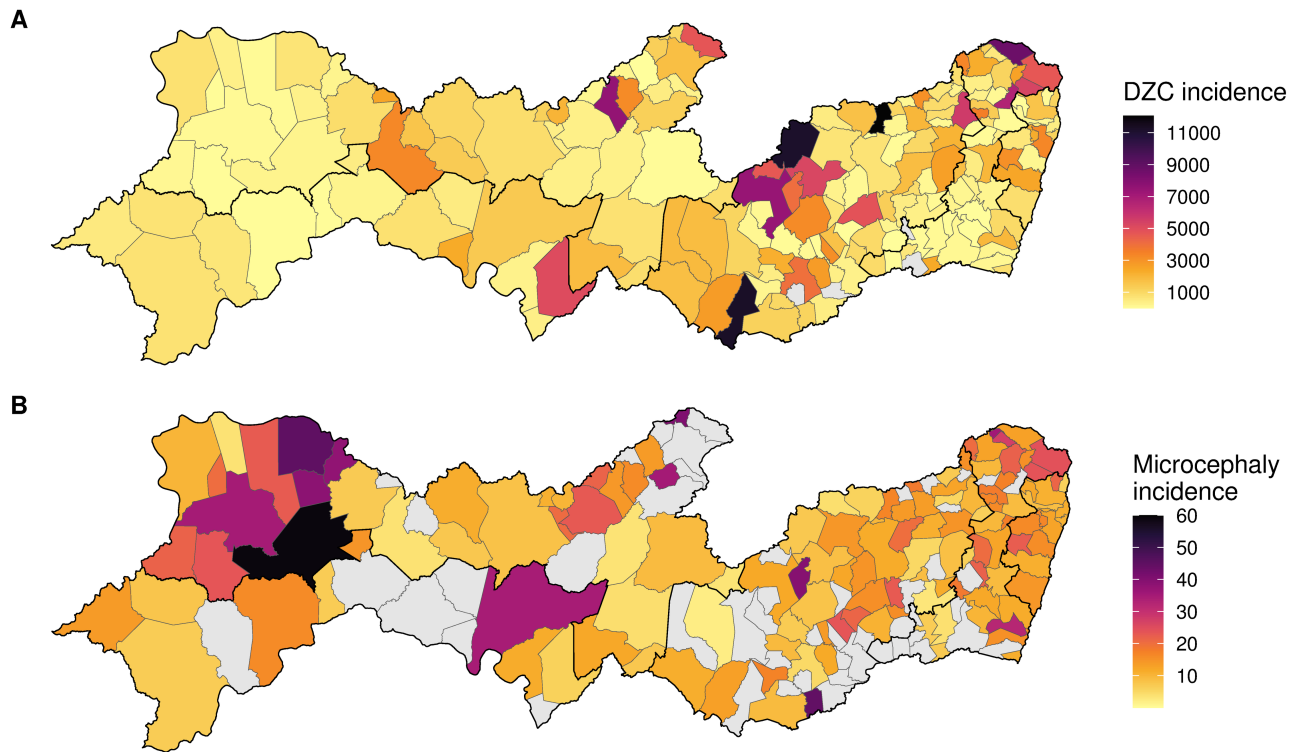

199 There were 26 clusters of dengue, Zika and chikungunya detected in 2014-2017 using the  
200 purely spatial scan statistics, with 11 high-risk and 15 low-risk clusters (S2 Table). The most likely  
201 high-risk cluster and the most likely low-risk cluster were both detected in the Metropolitan Region  
202 of Recife (Fig 4A). For microcephaly, five clusters were detected in 2015-2017, with three high-risk  
203 and two low-risk clusters (S3 Table). The most likely low-risk cluster was detected in the Agreste  
204 and Mata regions, and the most likely high-risk cluster in the Northwest of Sertão region (Fig 4B).  
205

206 Fig 4. Low and high-risk clusters of dengue, Zika, and chikungunya cases, 2014-2017 (A), and  
207 microcephaly, 2015-2017 (B), in Pernambuco state. Clusters are ordered by likelihood ratio.

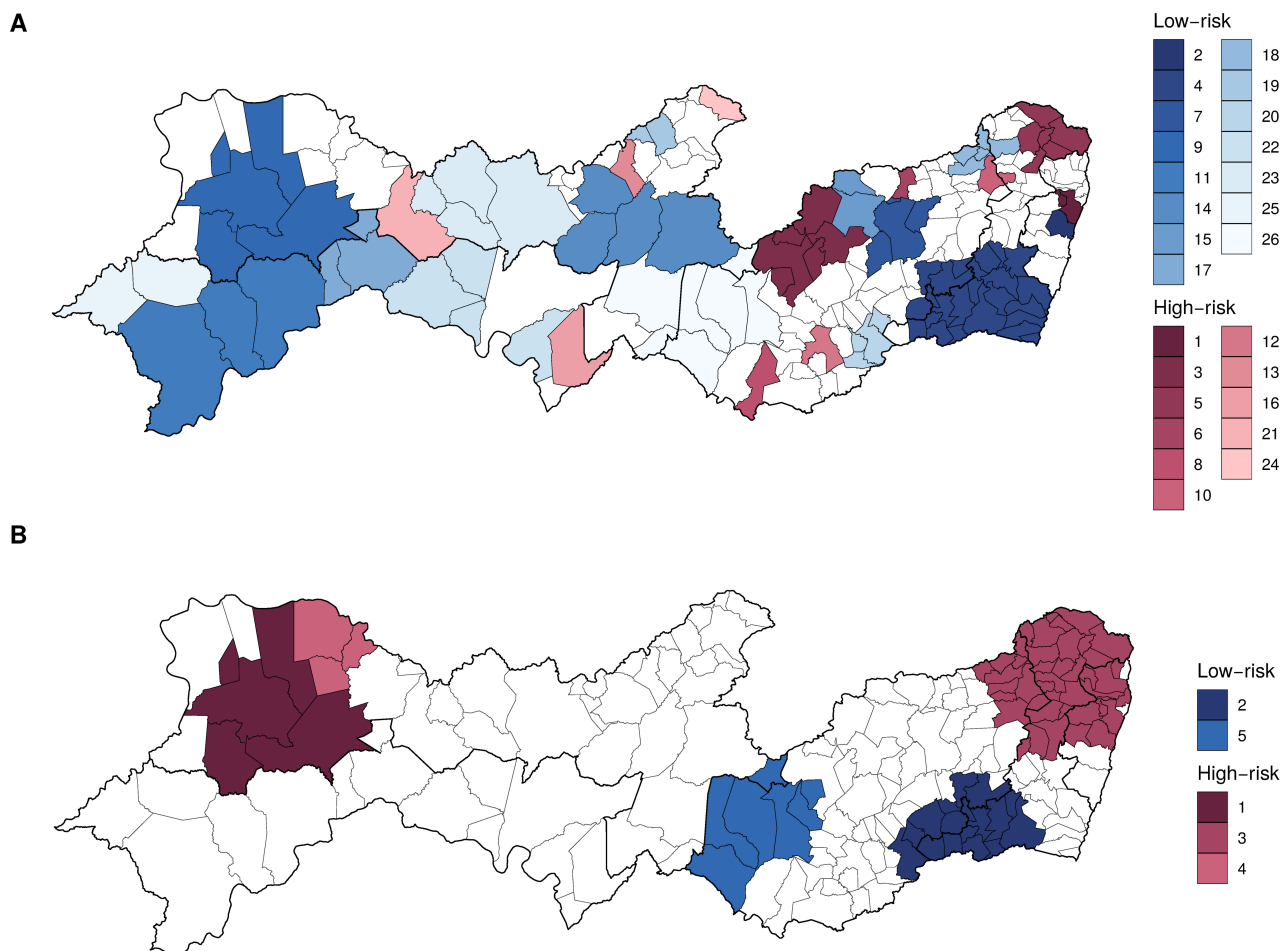

209 Combining the results of both scan statistics analyses (*Aedes*-borne diseases and  
210 microcephaly), of the 50 municipalities constituting high-risk microcephaly clusters, 10 were also  
211 high-risk for dengue, Zika, and chikungunya (Table 2). Of the 24 municipalities constituting low-  
212 risk microcephaly clusters, 19 were also low-risk for dengue, Zika, and chikungunya. The names of  
213 the municipalities in each category from Table 2 is available in the S4 Table.

214

215 **Table 2. Number and percentage of municipalities by cluster type for dengue, Zika, and**  
 216 **chikungunya (DZC) cases (2014-2017), and for microcephaly (2015-2017), Pernambuco state,**  
 217 **Brazil.**

|                  |            | Microcephaly cluster type |            |           | Total       |
|------------------|------------|---------------------------|------------|-----------|-------------|
|                  |            | High                      | No cluster | Low       |             |
| DZC cluster type | High       | 10 (5.4)                  | 12 (6.5)   | 1 (0.5)   | 23 (12.5)   |
|                  | No cluster | 29 (15.8)                 | 54 (29.3)  | 4 (2.1)   | 87 (47.3)   |
|                  | Low        | 11 (6.0)                  | 44 (23.9)  | 19 (10.3) | 74 (40.2)   |
| Total            |            | 50 (27.2)                 | 110 (59.8) | 24 (13.0) | 184 (100.0) |

218

219 In Fig 5 we combined the results from the scan statistics analysis to identify the most and  
 220 least affected municipalities. The municipalities identified as probable Zika hotspots are depicted in  
 221 warm colors. Sixty-three out of 184 municipalities were identified as hotspots for Zika.  
 222 Municipalities in the northeast of Pernambuco state and in the Sertão region were hardest-hit by the  
 223 Zika epidemic (Fig 5).

224 **Fig 5. Estimated Zika burden classification by municipality, 2014-2017, Pernambuco state,**  
 225 **Brazil.**

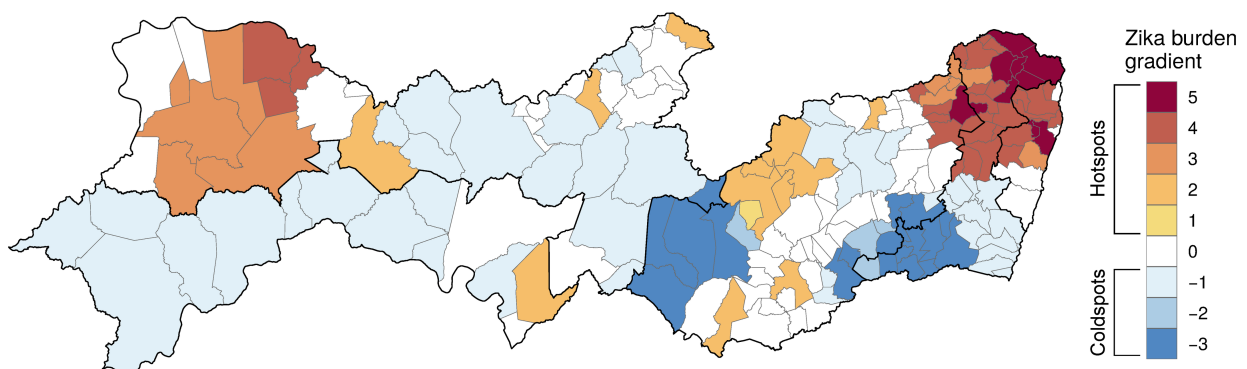

227

## 228 Discussion

229 Mandatory reporting of confirmed Zika cases came late in the epidemic in Brazil,  
230 hindering reliable identification of areas of high risk of Zika infection. Further issues with under-  
231 reporting also prevented reliable identification of high-risk areas for Zika in the country most  
232 affected by the epidemic. To address these issues, we identified spatial clusters of Zika, dengue, and  
233 chikungunya – three arboviruses that share the same disease vector, the *Ae. aegypti* mosquito – and  
234 of microcephaly in neonates cases to identify hidden Zika hotspots in the state of Pernambuco, one  
235 of the most affected by the epidemic.

236 The two high-risk microcephaly clusters were identified on opposite sides in the state, in  
237 the northeast – including parts of the Metropolitan Region of Recife, Mata and Agreste – and in a  
238 more western part of the Sertão region. A recent study estimated the spatiotemporal distribution of  
239 microcephaly in Pernambuco using a conditional autoregressive model and found high  
240 microcephaly prevalences also in the middle portion of the state [28]. In addition to having used a  
241 different methodology, the authors used data from a different source, the *Registro de Evento de*  
242 *Saúde Pública* [Public Health Event Registry] (RESP) system, explaining the differences in the  
243 results. The RESP system was implemented in November 2015 for the notification of cases of  
244 microcephaly or any other congenital anomalies. We opt to use SINASC data because it is more  
245 robust, as this system implemented in the country for many decades. In addition, the access to RESP  
246 data is more restrict.

247 Of 23 municipalities constituting high-risk clusters for *Aedes*-borne diseases, ten were also  
248 high-risk for microcephaly. One possible explanation is that, in these locations, dengue and/or  
249 chikungunya were more prevalent than Zika. However, it has been under discussion whether higher  
250 Zika incidence always translates into higher microcephaly incidence [9–11]. Microcephaly rates as  
251 high as those observed in Northeast Brazil were unprecedented and not observed anywhere else in  
252 the world where Zika has knowingly caused large epidemics. It seems that underlying factors may

253 be acting to modify the risk of developing microcephaly given the infection during pregnancy  
254 [11,25–27]. Even today, the reason why some regions of Northeast Brazil presented such high Zika-  
255 related microcephaly rates remains an open question.

256 Fifty municipalities constituted high-risk microcephaly clusters, with only ten of these also  
257 constituting high-risk clusters for *Aedes*-borne diseases. Because most cases of microcephaly in the  
258 region were caused by Zika [29], the pattern of high risk of microcephaly combined with a low risk  
259 of dengue, Zika and chikungunya suggests that there was under-reporting of *Aedes*-borne diseases  
260 in these municipalities. The under-reporting of acute infectious diseases is usually higher in poorer  
261 areas. As a consequence, using only *Aedes*-borne data would bias the identification of Zika high-  
262 risk areas. By combining the analyses using such data with analyses using microcephaly data, we  
263 successfully identified hidden Zika hotspots. Of note, the identification of Sertão region as a Zika  
264 hotspot was only possible because the scan statistics results for dengue, Zika, and chikungunya  
265 were combined with the results for microcephaly.

266 The northeast of Pernambuco and the Sertão region were hit hardest by the Zika epidemic.  
267 The first has the state's highest population density and urbanization rate. Because other arboviruses  
268 are more frequent in urban areas, these areas might see magnified risk of Zika. A recent study in  
269 Recife has described an association between precarious living conditions and higher microcephaly  
270 prevalence [27]. The urban poor in Brazil often live in households and areas that lack solid  
271 infrastructure, such as proper plumbing systems and waste disposal, leading to poor environmental  
272 hygiene associated with mosquito breeding. The Sertão region has one of the highest rates of social  
273 and economic inequality in Brazil and is also characterized by precarious health care access.

274 The coldspots need to be interpreted with caution. Further studies are needed to understand  
275 whether coldspots were identified as such due to under-reporting or because, in fact, the Zika  
276 burden was low in these locations. If the latter is true, the population of municipalities classified as

277 Zika coldspots may be at risk for future outbreaks. Seroprevalence studies can contribute to this  
278 issue.

279           Despite its important contributions, this study has some limitations. Due to the awareness  
280 surrounding the microcephaly epidemic, it is possible that microcephaly reporting was over-  
281 reported and a proportion of cases was misdiagnosed. To counterbalance this, we used information  
282 from the Live Births System, SINASC, instead of the RESP system, as it is more robust and less  
283 prone to bias caused by disease awareness. As already mentioned, there is under-reporting and  
284 misclassification of *Aedes*-borne diseases cases. To address the latter, we combined the three  
285 diseases – dengue, Zika and chikungunya – in the analysis. Different levels of under-reporting  
286 across the municipalities are expected, both for *Aedes*-borne diseases and microcephaly cases, and  
287 could bias our results. Finally, we did not consider covariates which might help predict spatial  
288 hotspots.

289           This analysis provides a much-needed classification of Zika risk in the state most affected  
290 by the epidemic. In doing so, this study provides a foundation for addressing the potential double  
291 jeopardy of two successive novel infectious disease outbreaks. Brazil is the country most affected  
292 by the Zika epidemic and has been an epicenter of the COVID-19 pandemic, with nearly 10.5  
293 million confirmed cases and more than 250 thousand deaths by February 28, 2021 [30]. The  
294 Brazilian population is therefore experiencing two successive outbreaks with reproductive health  
295 consequences. There is now evidence that pregnant women have higher chances of developing the  
296 severe form of COVID-19 [31]. There is also evidence of increase in stillbirth and preterm delivery  
297 during the pandemic [32]. Women at childbearing ages are further affected by the uncertainty and  
298 stress associated with a novel infectious disease, which can also be consequential to pregnant  
299 women and fetuses [33]. Such double jeopardy will directly impact how Brazilian women  
300 experience reproductive health and childbearing for cohorts to come.

301 Our study provides a foundation for research investigating social and environmental  
302 factors associated with Zika risk, advancing understanding of what makes a location a “risky” place.  
303 Merging data on socioeconomic characteristics, health surveillance infrastructure, and  
304 environmental conditions at the municipality level to our classification scheme represents an  
305 important next step in addressing this question. Our study also provides an important basis for  
306 analyses that identify risk of illnesses that are historically under-reported, a common issue  
307 particularly in low- and middle-income countries. The applied methodology has the potential to be  
308 adapted to instances in which a novel disease emerges and where under-reporting is also expected.  
309 As an example, excess deaths, influenza-like illness and hospitalizations due to severe acute  
310 respiratory illness, could be used to identify and classify high-risk areas for COVID-19.

311 The identification of high-risk areas for Zika has important research and policy  
312 implications. By combining Zika with other arboviruses and microcephaly, our approach offers a  
313 broader and potentially more reliable classification scheme for identifying Zika hotspots –  
314 information that can be used to inform public health research and policy. Importantly, our analysis  
315 identifies areas that might be particularly vulnerable to under-reporting, as suggested by the clusters  
316 that had high microcephaly risk but low *Aedes*-borne diseases risk.

317

## 318 **Acknowledgements**

319 We would like to thank the current and former members of the Decode Zika project: Ana  
320 Paula Portella, Irene Rossetto, Karlos Ramos, Kristine Hopkins, Luiz Gustavo Fernandes Sereno,  
321 and Ryan Lloyd.

322

## 323 **Funding**

324 This research was supported by the Eunice Kennedy Shriver National Institute of Child  
325 Health and Human Development (<https://www.nichd.nih.gov/>): grant R01HD091257 awarded to



326 LJM (PI: LJM, co-investigator: MD), and grants P2CH042849 and T32HD007081 awarded to the  
327 Population Research Center at the University of Texas at Austin. RL was supported by a Royal  
328 Society Dorothy Hodgkin Fellowship  
(<https://royalsociety.org/grants-schemes-awards/grants/dorothy-hodgkin-fellowship/>).

330

### 331 **Ethics**

332 This study was conducted under Institutional Review Board approval #2018-01-0055 from  
333 the University of Texas at Austin and the Brazilian National Commission for Research Ethics  
334 (CONEP – *Comissão Nacional de Ética em Pesquisa*) study approval CAAE:  
335 34032920.1.0000.5149.

336

### 337 **References**

1. Lowe R, Barcellos C, Brasil P, Cruz O, Honório N, Kuper H, et al. The Zika Virus Epidemic in Brazil: From Discovery to Future Implications. *International Journal of Environmental Research and Public Health*. 2018;15: 96. doi:10.3390/ijerph15010096
2. de Oliveira WK, de França GVA, Carmo EH, Duncan BB, de Souza Kuchenbecker R, Schmidt MI. Infection-related microcephaly after the 2015 and 2016 Zika virus outbreaks in Brazil: a surveillance-based analysis. *The Lancet*. 2017;390: 861–870. doi:10.1016/S0140-6736(17)31368-5
3. Kindhauser MK, Allen T, Frank V, Santhana RS, Dye C. Zika: the origin and spread of a mosquito-borne virus. *Bulletin of the World Health Organization*. 2016;94: 675-686C. doi:10.2471/BLT.16.171082
4. Costa LC, Veiga RV, Oliveira JF, Rodrigues MS, Andrade RFS, Paixão ES, et al. New Insights on the Zika Virus Arrival in the Americas and Spatiotemporal Reconstruction of the Epidemic Dynamics in Brazil. *Viruses*. 2020;13: 12. doi:10.3390/v13010012
5. Faria NR, Quick J, Claro IM, Thézé J, de Jesus JG, Giovanetti M, et al. Establishment and cryptic transmission of Zika virus in Brazil and the Americas. *Nature*. 2017;546: 406–410. doi:10.1038/nature22401
6. Magalhaes T, Braga C, Cordeiro MT, Oliveira AL, Castanha PM, Maciel APR, et al. Zika virus displacement by a chikungunya outbreak in Recife, Brazil. *PLOS Neglected Tropical Diseases*. 2017;11: e0006055.
7. Brady OJ, Osgood-Zimmerman A, Kassebaum NJ, Ray SE, de Araújo VEM, da Nóbrega AA, et al. The association between Zika virus infection and microcephaly in Brazil 2015–2017: An

- observational analysis of over 4 million births. Myers JE, editor. *PLOS Medicine*. 2019;16:e1002755. doi:10.1371/journal.pmed.1002755
8. Johansson MA, Mier-y-Teran-Romero L, Reefhuis J, Gilboa SM, Hills SL. Zika and the risk of microcephaly. *NEJM*. 2016;375: 1–4. doi:10.1056/NEJMp1605367
  9. Rodrigues LC, Paixao ES. Risk of Zika-related microcephaly: stable or variable? *The Lancet*. 2017;390: 824–826. doi:10.1016/S0140-6736(17)31478-2
  10. Costa F, Ko AI. Zika virus and microcephaly: where do we go from here? *The Lancet Infectious Diseases*. 2018;18: 236–237. doi:10.1016/S1473-3099(17)30697-7
  11. Jaenisch T, Rosenberger KD, Brito C, Brady O, Brasil P, Marques ET. Risk of microcephaly after Zika virus infection in Brazil, 2015 to 2016. *Bull World Health Organ*. 2017;95: 191–198. doi:10.2471/BLT.16.178608
  12. Kraemer MUG, Reiner RC, Brady OJ, Messina JP, Gilbert M, Pigott DM, et al. Past and future spread of the arbovirus vectors *Aedes aegypti* and *Aedes albopictus*. *Nature Microbiology*. 2019;4: 854–863. doi:10.1038/s41564-019-0376-y
  13. Paixão ES, Teixeira MG, Costa M da CN, Barreto ML, Rodrigues LC. Symptomatic Dengue during Pregnancy and Congenital Neurologic Malformations. *Emerging Infectious Diseases*. 2018;24: 1748–1750. doi:10.3201/eid2409.170361
  14. Brito CAA de, Brito CCM de, Oliveira AC, Rocha M, Atanásio C, Asfora C, et al. Zika in Pernambuco: rewriting the first outbreak. *Revista da Sociedade Brasileira de Medicina Tropical*. 2016;49: 553–558. doi:10.1590/0037-8682-0245-2016
  15. IBGE. Panorama Pernambuco. [cited 3 Aug 2020]. Available: <https://cidades.ibge.gov.br/brasil/pe/panorama>
  16. IBGE. Panorama Recife. [cited 3 Aug 2020]. Available: <https://cidades.ibge.gov.br/brasil/pe/recife/panorama>
  17. Ministério da Saúde B. Monitoramento integrado de alterações no crescimento e desenvolvimento relacionadas à infecção pelo vírus Zika e outras etiologias infecciosas, até a Semana Epidemiológica 52 de 2017. *Boletim Epidemiológico*. 2018;49. Available: <https://www.saude.gov.br/images/pdf/2018/fevereiro/20/2018-003-Final.pdf>
  18. Freire FHM de A, Gonzaga MR, Gomes MMF. Projeções populacionais por sexo e idade para pequenas áreas no Brasil. *Revista Latinoamericana de Población*. 2019;14: 124–149. doi:10.31406/relap2020.v14.i1.n26.6
  19. Wickham H, Averick M, Bryan J, Chang W, McGowan L, François R, et al. Welcome to the Tidyverse. *Journal of Open Source Software*. 2019;4: 1686. doi:10.21105/joss.01686
  20. Wickham H. *ggplot2: Elegant Graphics for Data Analysis*. Springer-Verlag. 2016. Available: <https://ggplot2.tidyverse.org/>
  21. The R Foundation for Statistical Computing. *R*. The R Foundation; 2020. Available: <https://www.r-project.org/>

22. Kulldorff M. A spatial scan statistic. *Communications in Statistics - Theory and Methods*. 1997;26: 1481–1496. doi:10.1080/03610929708831995
23. Kulldorff M. SaTScan. Available: <https://www.satscan.org/>
24. Kleinman K. rsatscan: Tools, Classes, and Methods for Interfacing with SaTScan Stand-Alone Software. 2015. Available: <https://CRAN.R-project.org/package=rsatscan>
25. Carvalho MS, Freitas LP, Cruz OG, Brasil P, Bastos LS. Association of past dengue fever epidemics with the risk of Zika microcephaly at the population level in Brazil. *Scientific Reports*. 2020;10. doi:10.1038/s41598-020-58407-7
26. Santa Rita TH, Barra RB, Peixoto GP, Mesquita PG, Barra GB. Association between suspected Zika virus disease during pregnancy and giving birth to a newborn with congenital microcephaly: a matched case-control study. *BMC Research Notes*. 2017;10. doi:10.1186/s13104-017-2796-1
27. Souza WV de, Albuquerque M de FPM de, Vazquez E, Bezerra LCA, Mendes A da CG, Lyra TM, et al. Microcephaly epidemic related to the Zika virus and living conditions in Recife, Northeast Brazil. *BMC Public Health*. 2018;18. doi:10.1186/s12889-018-5039-z
28. Alexander NDE, Souza WV, Rodrigues LC, Braga C, Sá A, Albuquerque Bezerra LC, et al. Spatiotemporal Analysis of the Population Risk of Congenital Microcephaly in Pernambuco State, Brazil. *International Journal of Environmental Research and Public Health*. 2020;17: 700. doi:10.3390/ijerph17030700
29. de Araújo TVB, Ximenes RA de A, Miranda-Filho D de B, Souza WV, Montarroyos UR, de Melo APL, et al. Association between microcephaly, Zika virus infection, and other risk factors in Brazil: final report of a case-control study. *The Lancet Infectious Diseases*. 2018;18: 328–336. doi:10.1016/S1473-3099(17)30727-2
30. WHO. Weekly epidemiological update - 2 March 2021. 2021 [cited 16 Dec 2020]. Available: <https://www.who.int/publications/m/item/weekly-epidemiological-update---2-march-2021>
31. CDC C for DC and P. CDC updates, expands list of people at risk of severe COVID-19 illness. In: Centers for Disease Control and Prevention [Internet]. 25 Jun 2020 [cited 8 Mar 2021]. Available: <https://www.cdc.gov/media/releases/2020/p0625-update-expands-covid-19.html>
32. Khalil A, von Dadelszen P, Draycott T, Ugwumadu A, O'Brien P, Magee L. Change in the Incidence of Stillbirth and Preterm Delivery During the COVID-19 Pandemic. *JAMA*. 2020 [cited 20 Jul 2020]. doi:10.1001/jama.2020.12746
33. Torche F. The Effect of Maternal Stress on Birth Outcomes: Exploiting a Natural Experiment. *Demography*. 2011;48: 1473–1491. doi:10.1007/s13524-011-0054-z

338

339
